# Supplementary material
Source: PubMed Central journal article supplement (PMC1868900)
Supplement: 7601688s1.pdf [file 7601688s1.pdf]

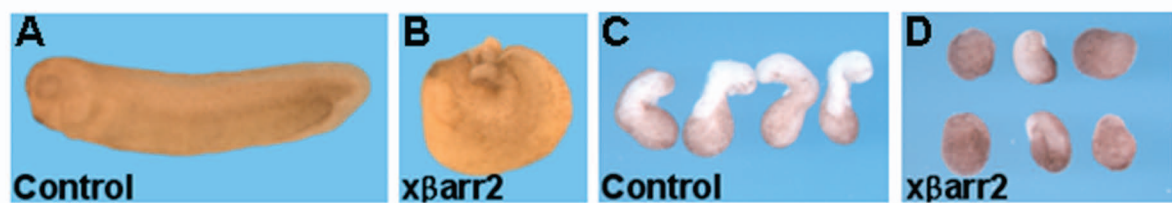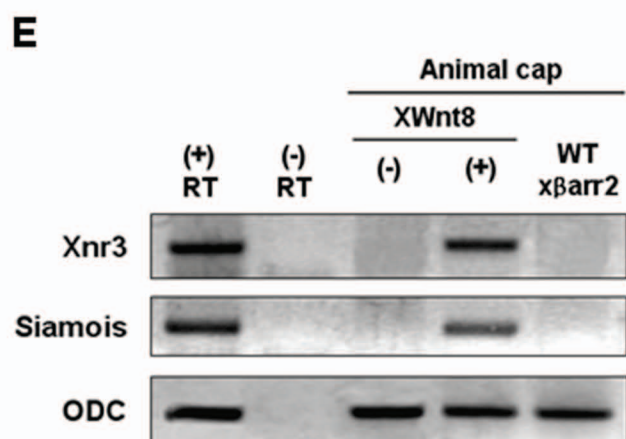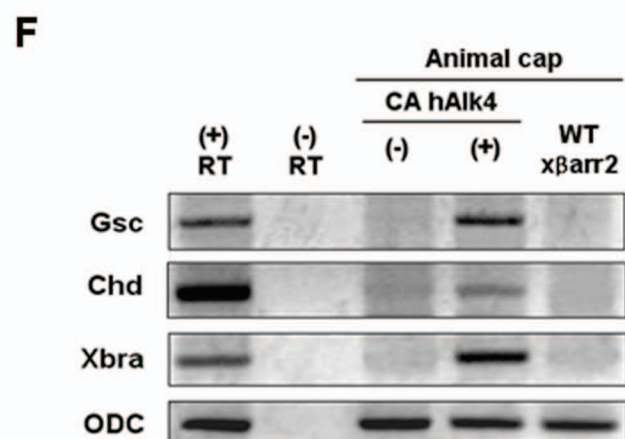

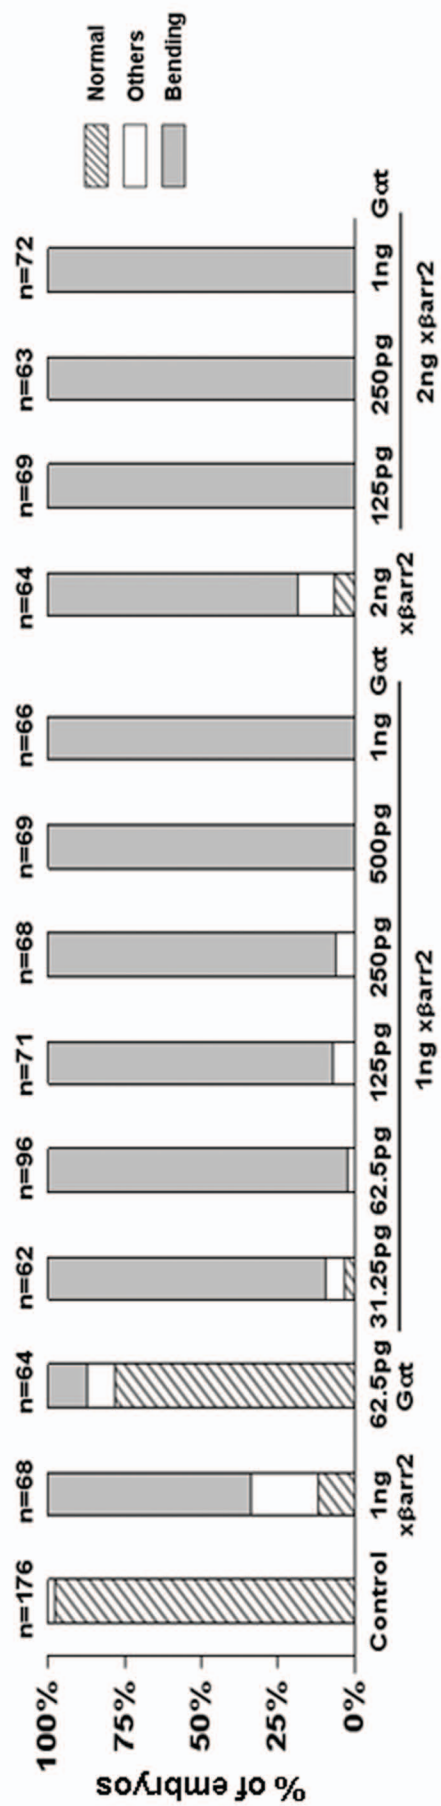

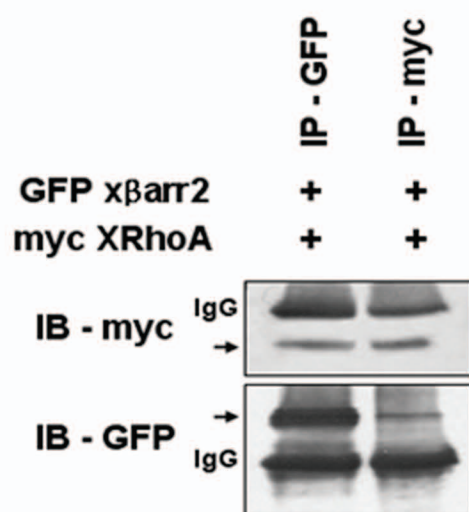

|         |     |                                                              |
|---------|-----|--------------------------------------------------------------|
| xβ arr2 | 1   | MGEKAGTRVFKKSSPNCKLTVYLGKRFVDHLDRVDPVGVVLLDYLKDRKVFVTLTC     |
| hβ arr2 | 1   | MGEKPGTRVFKKSSPNCKLTVYLGKRFVDHLDRVDPVGVVLLDYLKDRKVFVTLTC     |
| mβ arr2 | 1   | MGEKPGTRVFKKSSPNCKLTVYLGKRFVDHLDRVDPVGVVLLDYLKDRKVFVTLTC     |
| zβ arr2 | 1   | MGEKAGTRVFKKSSPNCKLTVYLGKRFVDHLDRVDPVGVVLLDYLKDRKVFVTLTC     |
| xβ arr2 | 61  | AFRYGREDLDVGLSFRKDLFISTFQAVPPLPEEKKPLTRLQERLLKKLGECAHPFFFTI  |
| hβ arr2 | 61  | AFRYGREDLDVGLSFRKDLFISTFQAVPPLPEEKKPLTRLQERLLKKLGECAHPFFFTI  |
| mβ arr2 | 61  | AFRYGREDLDVGLSFRKDLFISTFQAVPPLPEEKKPLTRLQERLLKKLGECAHPFFFTI  |
| zβ arr2 | 61  | AFRYGREDLDVGLSFRKDLFISTFQAVPPLPEEKKPLTRLQERLLKKLGECAHPFFFTI  |
| xβ arr2 | 121 | PQNLPCSVTLQPGPEDTGKACGVDFEIRAFCAKSNEEKSHKRNSVRLVIRKVQFAPEKPG |
| hβ arr2 | 121 | PQNLPCSVTLQPGPEDTGKACGVDFEIRAFCAKSNEEKSHKRNSVRLVIRKVQFAPEKPG |
| mβ arr2 | 121 | PQNLPCSVTLQPGPEDTGKACGVDFEIRAFCAKSNEEKSHKRNSVRLVIRKVQFAPEKPG |
| zβ arr2 | 121 | PQNLPCSVTLQPGPEDTGKACGVDFEIRAFCAKSNEEKSHKRNSVRLVIRKVQFAPEKPG |
| xβ arr2 | 181 | PQPSAETTRHFLMSDRSLHLEASLDKELYVHGEPINNVVHVTNNSKTVKRIKVSRY     |
| hβ arr2 | 181 | PQPSAETTRHFLMSDRSLHLEASLDKELYVHGEPINNVVHVTNNSKTVKRIKVSRY     |
| mβ arr2 | 181 | PQPSAETTRHFLMSDRSLHLEASLDKELYVHGEPINNVVHVTNNSKTVKRIKVSRY     |
| zβ arr2 | 181 | PQPMVETTRHFLMSDRSLHLEASLDKELYVHGEPINNVVHVTNNSKTVKRIKVSRY     |
| xβ arr2 | 240 | ADICLFSTAQKCPVAQLELDDLVASSTFCKVYTIPTLLSNREKRGALDGLKHEDT      |
| hβ arr2 | 240 | ADICLFSTAQKCPVAQLELDDLVASSTFCKVYTIPTLLSNREKRGALDGLKHEDT      |
| mβ arr2 | 241 | ADICLFSTAQKCPVAQLELDDLVASSTFCKVYTIPTLLSNREKRGALDGLKHEDT      |
| zβ arr2 | 240 | ADICLFSTAQKCPVAQLELDDLVASSTFCKVYTIPTLLSNREKRGALDGLKHEDT      |
| xβ arr2 | 300 | NLASSTIVKEGANKEVLGILVSVRVKVKLVVSRGGDVSVELPFVLMHPKPHDITLPRPC  |
| hβ arr2 | 300 | NLASSTIVKEGANKEVLGILVSVRVKVKLVVSRGGDVSVELPFVLMHPKPHDITLPRPC  |
| mβ arr2 | 301 | NLASSTIVKEGANKEVLGILVSVRVKVKLVVSRGGDVSVELPFVLMHPKPHDITLPRPC  |
| zβ arr2 | 300 | NLASSTIVKLSNKEVLGILVSVRVKVKLVVSRGGDVSVELPFVLMHPKPHDITLPRPC   |
| xβ arr2 | 358 | SAVPETDVPVDTLLIEFDTNFAIDDDIVFEDFRLRLKGLKDDKDDQAYC            |
| hβ arr2 | 360 | SAVPETDVPVDTLLIEFDTNFAIDDDIVFEDFRLRLKGMKDDQDDQLC             |
| mβ arr2 | 361 | SAPREIDIPVDLILIEFDTNFAIDDDIVFEDFRLRLKGMKDDQDDQFC             |
| zβ arr2 | 359 | SAVPETDVPVDTLLIEFDTNFAIDDDIVFEDFRLRLKGMKDEEDLHFC             |

**Yellow (KRK → Q)**  
: Phosphoinositide-binding site

**Red (LIEF → AAEA)**  
: Clathrin-binding site

**Pink (RLR → ALA)**  
: AP2-binding site

**Figure S1. Antisense morpholino oligonucleotides of  $x\beta$ arr2.** (A) Scheme of the morpholino sequence targeting the  $x\beta$ arr2 5' sequences. (B)  $x\beta$ arr2 MO specifically inhibited the translation of its cognate mRNA. 5'UTR (500pg) and ORF (500pg)  $x\beta$ arr2-myc mRNA were injected with  $x\beta$ arr2 MO (10ng) into the animal regions of embryos at the four-cell stage. Animal cap explants isolated at early gastrula stages were then subjected to IB analysis with anti-myc antibodies. Actin served as a specificity control. (C)  $x\beta$ arr2 MO reduced the endogenous levels of  $\beta$ arr2 protein. DMZ explants were blotted with anti- $\beta$ arr2 antibodies.

**Figure S2. Gain-of-function of  $x\beta$ arr2 disrupts CE movements.** (A-D) Overexpression of  $x\beta$ arr2 blocked CE movements in intact embryos and dorsal marginal zone (DMZ) tissues. Two blastomeres of four-cell stage embryos were injected at the dorsal equatorial region with  $x\beta$ arr2 mRNA (1 ng). (E-F)  $x\beta$ arr2 did not induce the dorsal mesodermal genes expressed by Wnt and Activin signaling. Four-cell stage embryos were microinjected into the animal regions of all blastomeres with  $x\beta$ arr2 (1 ng), Wnt8 (20 pg), or CA hAlk4 (2 ng). Animal caps were dissected at stage 8.5, cultured until stage 10.5 and analyzed by RT-PCR. *ODC*, a loading control. (–) RT, minus reverse transcription control sample.

**Figure S3. Rescue assays using  $\beta$ arr2 and  $\alpha$ -transducin (*Gat*).** The CE-defective phenotypes

caused by  $x\beta$ arr2 were not rescued by  $\alpha$ -transducin. Quantitative rescue assays were performed more than three times. n, total number of embryos. Others indicate a truncated and mild kinked axis.

**Figure S4. Reciprocal immunoprecipitation analysis of  $x\beta$ arr2 and XRhoA.** HEK293FT cells were transfected with GFP  $x\beta$ arr2 and myc XRhoA. HEK293TF Cell lysates were immunoprecipitated with anti-GFP antibodies for  $x\beta$ arr2 (lane 1) and anti-myc antibodies for Hrs (lane 2), respectively. Immunocomplexes were blotted with specific antibodies.

**Figure S5. A site-directed mutagenesis of  $x\beta$ arr2.**  $\beta$ arr2 sequences, which are important to target receptors to clathrin-coated pits for endocytosis, from other species is conserved with *Xenopus* orthologue. Mutation of these sequences was indicated by the color boxes (Yellow, KRK→3Q; Red, LIEF→AAEA; Pink, RLR→ALA).
